# Supplementary material for: Microstructure and Mechanical Properties of Dual Scaled NbC/Ti2AlC Reinforced Titanium–Aluminum Composite
Source: MDPI journal article supplement (doi:10.3390/ma16134661), 2023-06-28
Supplement: s1 [file s1]

## Supplementary Files

**Table S1.** Parallel test data of room temperature compression tests (group 1).

| <b>Samples</b><br><b>Properties</b>      | <b>TiAlNb</b> | <b>T0.5</b> | <b>T1</b> | <b>T2</b> | <b>T3</b> |
|------------------------------------------|---------------|-------------|-----------|-----------|-----------|
|                                          |               |             |           |           |           |
| Compression Strain (%)                   | 18.4          | 23.2        | 24.1      | 22.7      | 19.9      |
| Compression Stress (MPa)                 | 1538          | 2020        | 2301      | 2206      | 2038      |
| Fracture toughness (MPa/m <sup>2</sup> ) | 19.0          | 23.9        | 25.9      | 25.1      | 21.7      |

**Table S2.** Parallel test data of room temperature compression tests (group 2).

| <b>Samples</b><br><b>Properties</b>      | <b>TiAlNb</b> | <b>T0.5</b> | <b>T1</b> | <b>T2</b> | <b>T3</b> |
|------------------------------------------|---------------|-------------|-----------|-----------|-----------|
|                                          |               |             |           |           |           |
| Compression Strain (%)                   | 17.0          | 22.1        | 24.9      | 21.5      | 18.0      |
| Compression Stress (MPa)                 | 1570          | 2069        | 2240      | 2224      | 2105      |
| Fracture toughness (MPa/m <sup>2</sup> ) | 15.9          | 23.2        | 27.2      | 25.9      | 20.7      |

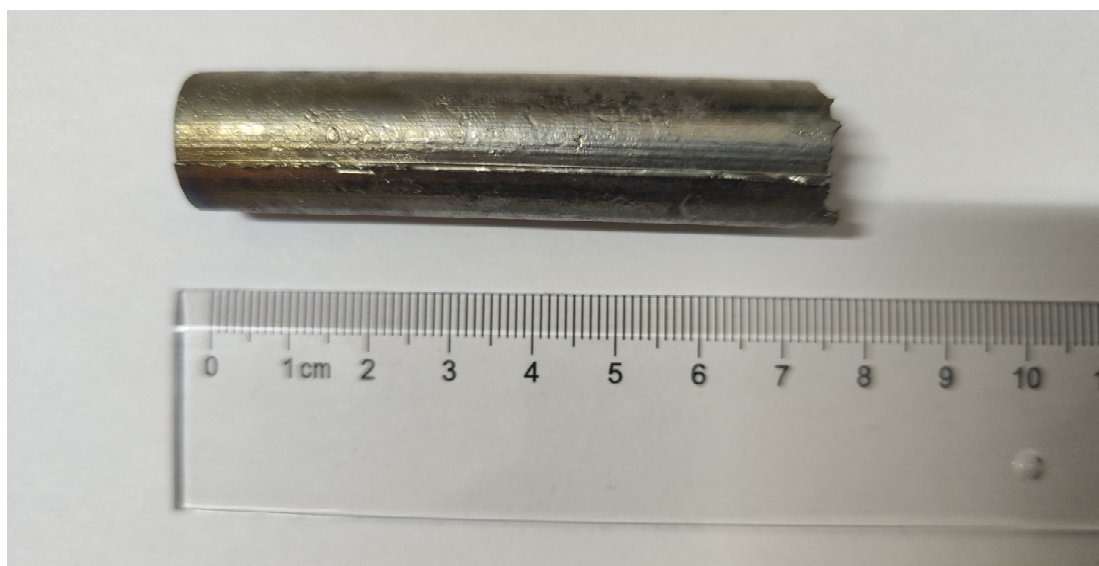

**Figure S1.** Macro photo of the sample T1.
